# Supplementary material
Source: MDPI journal article supplement (https://www.mdpi.com/2072-4292/11/18/2092)
Supplement: s1 [file s1]

## Supplementary Material

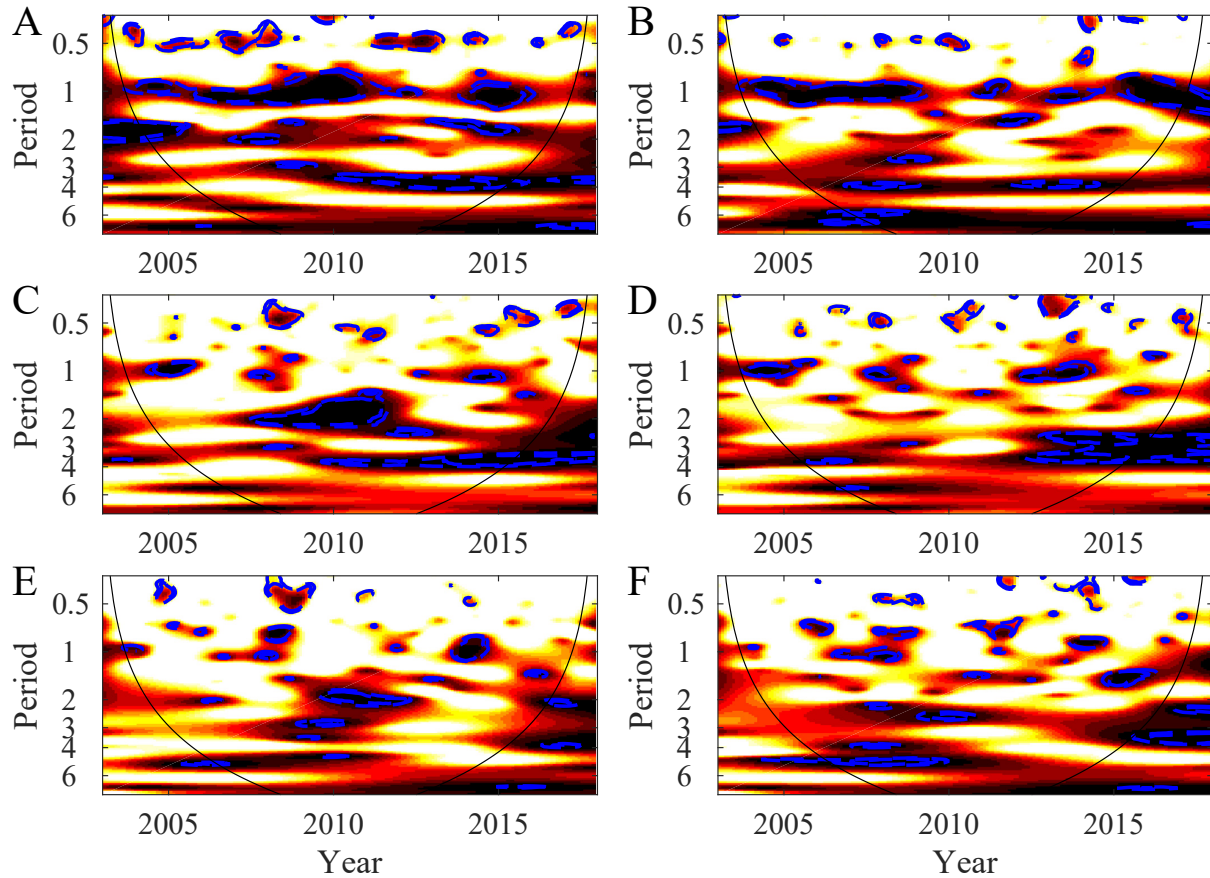

**Figure S1:** Wavelet coherence between A) Chl-a and SST in northern area. B) Chl-a and SST in southern area. C) Chl-a in northern area and SAM. D) Chl-a in northern area and SAM. E) Chl-a in northern area and SOI. F) Chl-a in southern area and SOI. Blue dashed lines indicate the 95% and 90% significant areas obtained by adapted bootstrapping (Cazelles et al., 2014) and the cone of influence (solid black lines) indicates the regions where the wavelet computations are not influenced by edge effects. The colour code for synchrony values is graded from yellow (low synchrony) to red (high synchrony). Temporal period of the y-label are on log<sub>2</sub> scale.

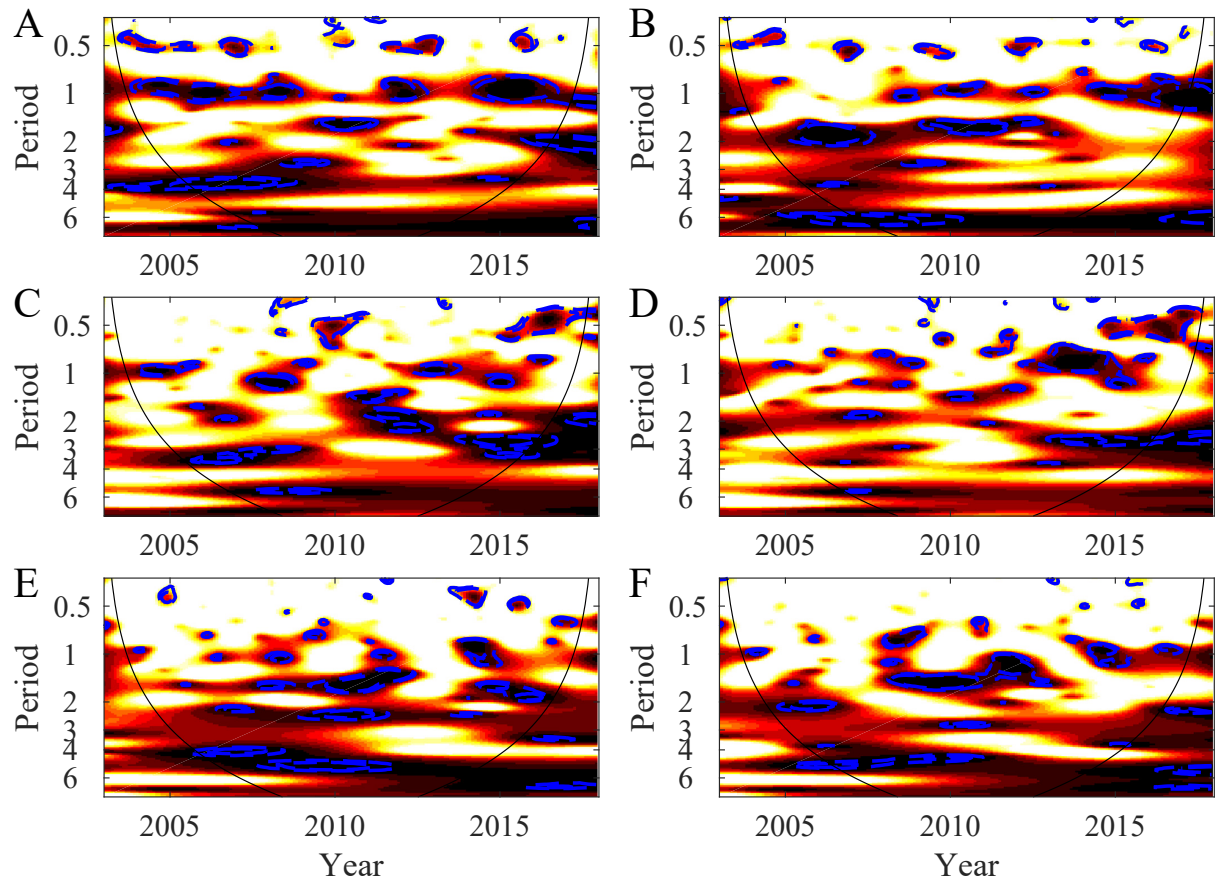

**Figure S2:** Wavelet coherence between A) nFLH--a and SST in northern area. B) nFLh and SST in southern area. C) nFLh in northern area and SAM. D) nFLh in northern area and SAM. E) nFLH in northern area and SOI. F) nFLH in southern area and SOI. Blue dashed lines indicate the 95% and 90% significant areas obtained by adapted bootstrapping (Cazelles et al., 2014) and the cone of influence (solid black lines) indicates the regions where the wavelet computations are not influenced by edge effects. The colour code for synchrony values is graded from yellow (low synchrony) to red (high synchrony). Temporal period of the y-label are on log<sub>2</sub> scale.

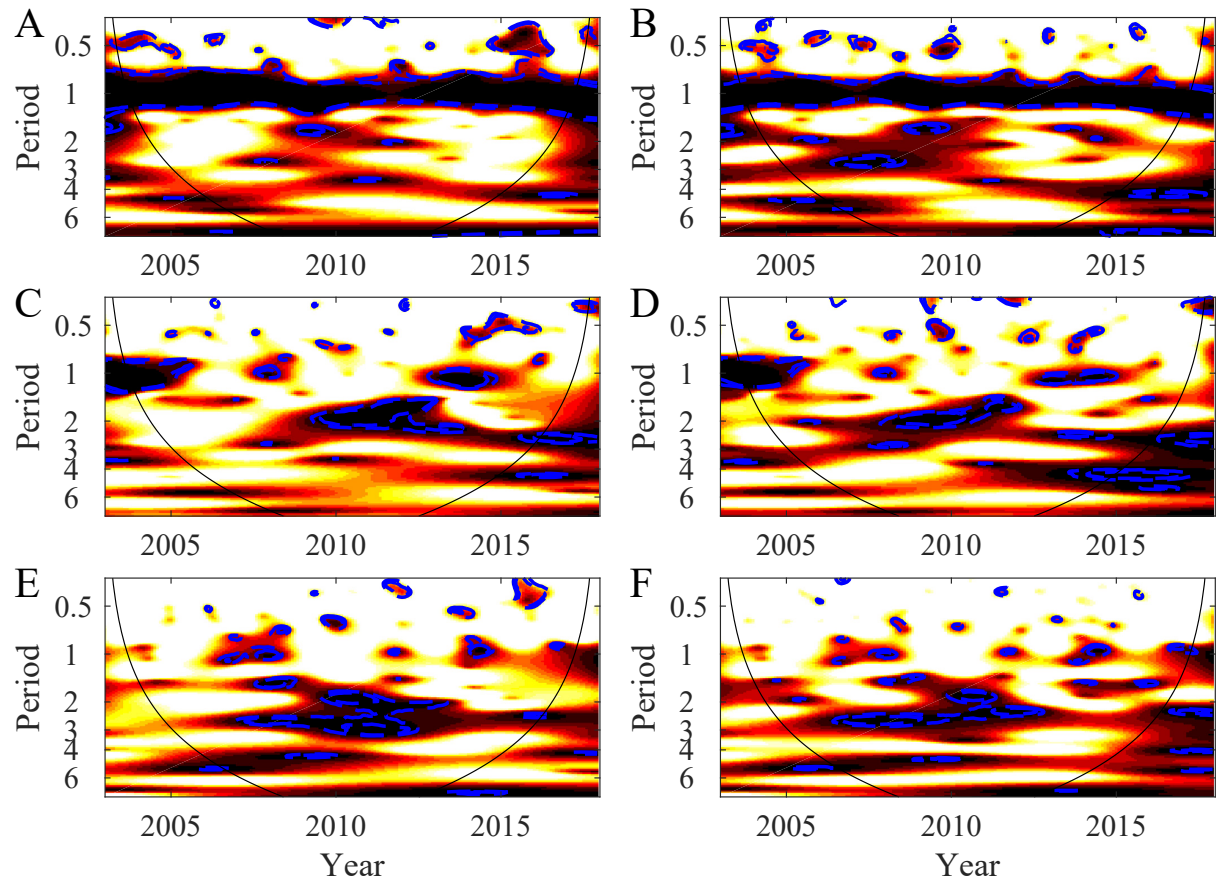

**Figure S3:** Wavelet coherence between A) EVI and SST in northern area. B) EVI and SST in southern area. C) EVI in northern area and SAM. D) EVI in northern area and SAM. E) EVI in northern area and SOI. F) EVI in southern area and SOI. Blue dashed lines indicate the 95% and 90% significant areas obtained by adapted bootstrapping (Cazelles et al., 2014) and the cone of influence (solid black lines) indicates the regions where the wavelet computations are not influenced by edge effects. The colour code for synchrony values is graded from yellow (low synchrony) to red (high synchrony). Temporal period of the y-label are on log<sub>2</sub> scale.
